# Supplementary material for: Fault-controlled fluid circulation and diagenesis along basin-bounding fault systems in rifts – insights from the East Greenland rift system
Source: Copernicus journal article supplement (doi:10.5194/se-11-1987-2020), 2020-11-05
Supplement: Supplementary file 1 [file se-11-1987-2020-supplement.zip]

Archive with 3 entries (3 files):
- Salomon_etal_DombjergFluid_U-PbAnalysisData.xlsb
- Salomon_etal_DombjergFluid_SupplementaryInfoFiguresTable.pdf
- se-11-1987-2020-supplement-title-page.pdf
