# Supplementary material for: Fault-controlled fluid circulation and diagenesis along basin-bounding fault systems in rifts – insights from the East Greenland rift system
Source: Copernicus journal article supplement (doi:10.5194/se-11-1987-2020), 2020-11-05
Supplement: Supplementary file 1 [file se-11-1987-2020-supplement.zip › se-11-1987-2020-supplement-title-page.pdf]

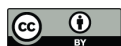

## *Supplement of*

# **Fault-controlled fluid circulation and diagenesis along basin-bounding fault systems in rifts – insights from the East Greenland rift system**

**Eric Salomon et al.**

*Correspondence to:* Eric Salomon (e.salomon@outlook.de)

- se-11-1987-2020-supplement-title-page.pdf
- Salomon\_etal\_DombjergFluid\_SupplementaryInfoFiguresTable.pdf
- Salomon\_etal\_DombjergFluid\_U-PbAnalysisData.xlsb

The copyright of individual parts of the supplement might differ from the CC BY 4.0 License.
